# Supplementary material for: Overlapping Regions in HIV-1 Genome Act as Potential Sites for Host–Virus Interaction
Source: Front Microbiol. 2016 Nov 4;7:1735. doi: 10.3389/fmicb.2016.01735 (PMC5095123; doi:10.3389/fmicb.2016.01735)
Supplement: Supplementary file 3 [file Table_3.XLS]

## Sheet: Sheet1
Supplementary Table-3(a): Compiled list of experimentally validated HIV-1 SLiMs (from literature) and their host target
Gene_name	ELM id/domain_in_viral_prt	human_prt_interactor_protein	domain/ELM id_in_human_prt
gag	LIG_SH2_STAT3	P08631	SH2
gag	LIG_SH2_STAT5	P08631	SH2
gag	MOD_CK1_1	Q13177	Pkinase
gag	MOD_CK2_1	Q13177	Pkinase
gag	MOD_GSK3_1	Q13177	Pkinase
gag	MOD_NMyristoyl	P30419	NMT_C
gag	MOD_PKA_2	Q13177	Pkinase
gag	LIG_LYPXL_L_2	ALIX	-
pol	LIG_APCC_Dbox_1	Q9NRG9	WD40
pol	LIG_MAPK_1	P28482	Pkinase
pol	MOD_CK1_1	P28482	Pkinase
pol	MOD_CK2_1	P28482	Pkinase
pol	MOD_GSK3_1	P28482	Pkinase
pol	MOD_PKA_2	P28482	Pkinase
pol	MOD_PLK	P28482	Pkinase
pol	MOD_ProDKin_1	P28482	Pkinase
pol	TRG_ENDOCYTIC_2	Q96CW1	Adap_comp_sub
nef	LIG_MAPK_1	Q99683	Pkinase
nef	LIG_SH2_STAT3	P27986	SH2
nef	LIG_SH2_STAT5	P27986	SH2
nef	LIG_SH3_2	Q92608	SH3_2
nef	LIG_SH3_3	Q8TEJ3	SH3_1
nef	MOD_CK1_1	Q99683	Pkinase
nef	MOD_CK2_1	Q99683	Pkinase
nef	MOD_GSK3_1	Q99683	Pkinase
nef	MOD_NMyristoyl	P30419	NMT_C
nef	MOD_PKA_2	Q99683	Pkinase
nef	MOD_ProDKin_1	Q99683	Pkinase
nef	TRG_ENDOCYTIC_2	Q9Y6Q5	Adap_comp_sub
nef	TRG_LysEnd_APsAcLL_1	Q96PC3	Clat_adaptor_s
tat	CLV_PCSK_FUR_1	P09958	Peptidase_S8
tat	CLV_PCSK_PC1ET2_1	P09958	Peptidase_S8
tat	CLV_PCSK_PC7_1	P09958	Peptidase_S8
tat	LIG_CYCLIN_1	P51946	Cyclin_N
tat	LIG_FHA_1	Q12972	FHA
tat	LIG_FHA_2	Q12972	FHA
tat	LIG_SH2_STAT3	P42224	SH2
tat	LIG_SH3_1	P41240	SH3_1
tat	LIG_SH3_3	P41240	SH3_1
tat	MOD_GSK3_1	Q9Y243	Pkinase
tat	MOD_PIKK_1	Q8NEB9	PI3_PI4_kinase
tat	MOD_PKA_1	Q9Y243	Pkinase
tat	MOD_PKA_2	Q9Y243	Pkinase
rev	LIG_ULM_U2AF65_1	Q07955	RRM_1
rev	MOD_CK1_1	P68400	Pkinase
rev	MOD_CK2_1	P68400	Pkinase
rev	MOD_GSK3_1	P68400	Pkinase
rev	MOD_PKA_2	P68400	Pkinase
rev	MOD_ProDKin_1	P68400	Pkinase
rev	TRG_NES_CRM1_1	O14980	Xpo1
vif	LIG_SH2_STAT3	P08631	SH2
vif	LIG_SH2_STAT5	P08631	SH2
vif	LIG_SH3_1	P08631	SH3_1
vif	LIG_SH3_3	P08631	SH3_1
vif	LIG_WW_2	Q96J02	WW
vif	MOD_PKA_1	P28482	Pkinase
vif	MOD_PKA_2	P28482	Pkinase
vif	MOD_PKB_1	P28482	Pkinase
vif	MOD_ProDKin_1	P28482	Pkinase
vif	MOD_TYR_ITIM	P08631	SH2
env	CLV_PCSK_FUR_1	Q92824	Peptidase_S8
env	CLV_PCSK_PC1ET2_1	Q92824	Peptidase_S8
env	CLV_PCSK_PC7_1	Q92824	Peptidase_S8
env	CLV_PCSK_SKI1_1	Q92824	Peptidase_S8
env	LIG_NRBOX	P11473	Hormone_recep
vpu	LIG_USP7_1	Q13077	MATH
vpu	MOD_CK2_1	P68400	Pkinase
vpu	MOD_GSK3_1	P68400	Pkinase
vpu	MOD_PKA_2	P68400	Pkinase
vpu	MOD_PLK	P68400	Pkinase
vpu	LIG_SCF-TrCP1_1	Phosphodegron β TrCP1

## Sheet: Sheet2
Supplementary Table-3(b): List of experimentally verified SLiMs found in our study, the genes in which they reside and their putative location in OVR/NOVR or both NOVR and OVR
Gene	True Experimentally verified SLiM ID	Location in OVR/NOVR/Both
tat	CLV_PCSK_FUR_1	NOVR
vpu	MOD_GSK3_1	NOVR
vif	MOD_PKB_1	NOVR
tat	MOD_PIKK_1	NOVR
tat	LIG_SH3_3	BOTH
vif	MOD_PKA_1	NOVR
gag	MOD_NMyristoyl	NOVR
rev	TRG_NES_CRM1_1	OVR
vif	LIG_WW_2	NOVR
vif	LIG_SH3_1	NOVR
vpu	MOD_PLK	NOVR
tat	LIG_FHA_2	OVR
gag	LIG_PTAP_UEV_1	OVR
gag	LIG_LYPXL_L_2	OVR
rev	MOD_GSK3_1	OVR
rev	MOD_ProDKin_1	OVR
rev	LIG_ULM_U2AF65_1	OVR
tat	LIG_FHA_1	OVR
rev	TRG_NES_CRM1_1	OVR
